# Supplementary material for: Mixing cations with different alkyl chain lengths markedly depresses the melting point in deep eutectic solvents formed from alkylammonium bromide salts and urea
Source: Royal Society of Chemistry journal article supplement (doi:10.1039/c7cc00201g), 2017-01-01
Supplement: c7cc00201g1.pdf [file c7cc00201g1.pdf]

Supporting file for

**Mixing cations with different alkyl chain lengths markedly depresses the freezing point in deep eutectic solvents formed from alkylammonium bromide salts and urea**

Zhengfei Chen,<sup>a</sup> Tamar L. Greaves,<sup>b</sup> Gregory G. Warr<sup>c</sup> and Rob Atkin<sup>a\*</sup>

<sup>a</sup>Priority Research Centre for Advanced Fluids and Interfaces, Newcastle Institute for Energy and Resources, The University of Newcastle, Callaghan, NSW 2308, Australia. Email: rob.atkin@newcastle.edu.au.

<sup>b</sup>School of Science, College of Science, Engineering and Health, RMIT University, GPO Box 2476, Melbourne, Victoria 3001, Australia.

<sup>c</sup>School of Chemistry, The University of Sydney, Sydney, NSW 2006 Australia.

## Experimental details

**Materials.** Alkylamines (ethylamine (66-72% in H<sub>2</sub>O) and butylamine (99.5%)) were purchased from Sigma Aldrich. Concentrated hydrobromic acid (HBr) (48% in H<sub>2</sub>O) was purchased from Fluka. Urea powder was purchased from Sigma Aldrich. All materials were used without further purification.

**General sample preparation.** Alkylammonium bromide salts were prepared via a 1:1 molar acid-base reaction in an ice-chilled environment. Concentrated hydrobromic acid (HBr) was slowly added to a diluted, aqueous solution of alkylamine (~ 40 %) and then stirred for several hours. The majority of water was removed using a rotational evaporator at 50 °C to yield a colourless solid. The alkylammonium bromide salts (ethylammonium bromide (EABr), or butylammonium bromide (BABr)) were further dried in an oven at 110 °C for at least 2 hours.

Mixtures of EABr, BABr or EABr-BABr with urea were prepared by mixing the alkylammonium salts and urea at different salt : urea molar ratios in a sealed glass vial at 80 °C until a homogeneous clear solution was formed. For higher salt content, higher temperatures were used but for a very short period due to the reactions between salt and urea at elevated temperatures. The water contents were always below 0.6 wt% for the investigated mixtures, determined by Karl Fischer titration (Metrohm 870 KF Titrino Plus). The purity of each system at the eutectic point was examined using <sup>1</sup>H-NMR-Spectroscopy (c.f. ESI, Figure S3).

**Melting point determination.** Differential scanning calorimetry (DSC) was performed using a DSC-60A (Shimadzu) system under a nitrogen atmosphere. An indium standard was used to calibrate the DSC temperature (0.3 °C). The DES solid samples were run in an aluminium pan in a sealed furnace from room temperature to 250 °C at a rate of 10 °C /min. The liquid samples were cooled to -80 °C before heating at 10 °C /min up to 250 °C. The melting temperature,  $T_m$ , was determined from the exothermic peak of the DSC traces.

**Density and viscosity measurements.** The density and viscosity of the deep eutectic solvents were measured simultaneously on a density meter coupled with a microviscometer (Anton Paar DMA4100M) from 25 °C to 80 °C in a sealed environment. The EABr : urea (1:1) solidified quickly below its melting point (46 °C) therefore its density and viscosity could not be determined.

**Ionic conductivity.** Ionic conductivity measurements were carried out with an Eutech Instruments Con 510 conductivity meter. The instrument was calibrated with a 0.01 M potassium chloride (KCl) solution before each measurement. A glass vial containing the DES was sealed with parafilm after the electrode was inserted to prevent water absorption. Temperature was controlled using a water bath with an accuracy of  $\pm 0.5$  °C. The heating rate for all samples was less than 1 °C / min.

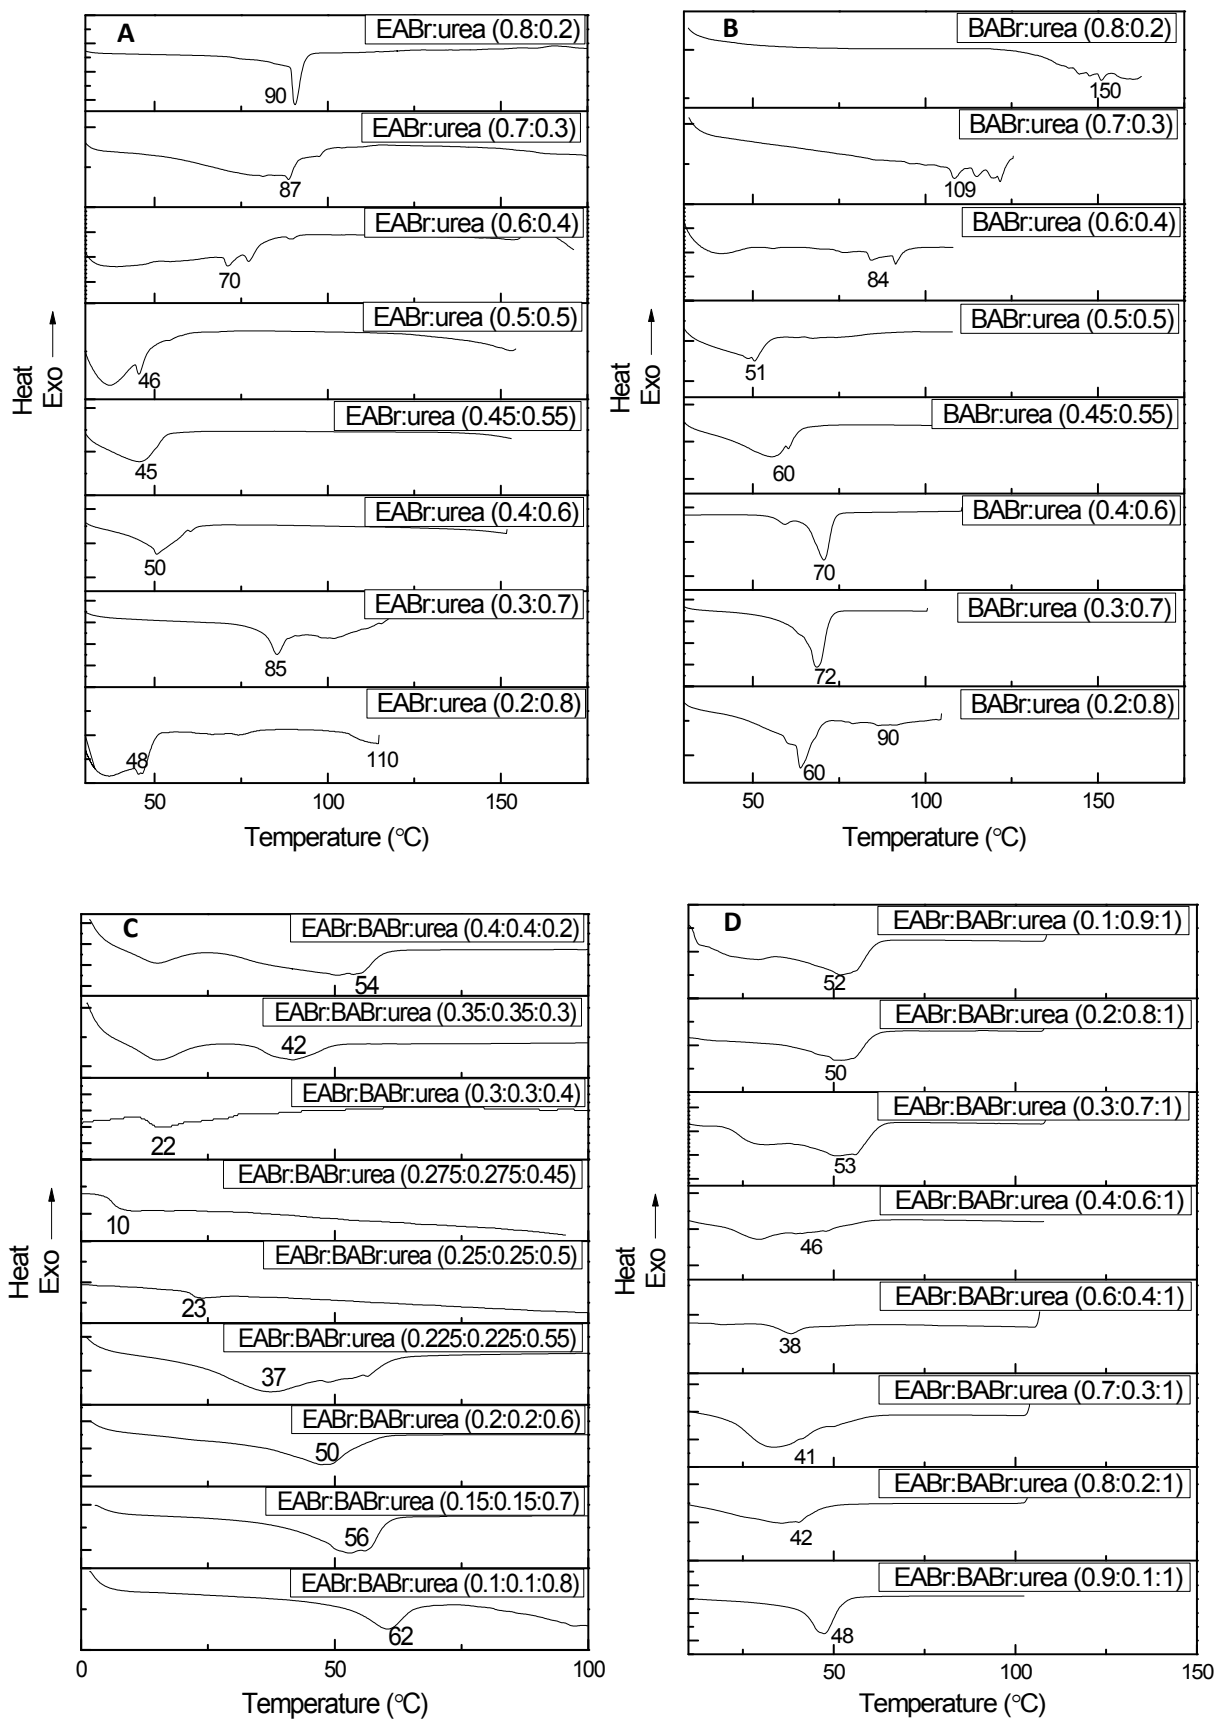

**Figure S1.** DSC traces for all samples that shown in Figure 2 in the main text. A: EABr:urea system; B: BABr:urea system; C: EABr:BABr:urea system and D: samples for Figure 2 inset. Samples were run at 10 °C/min. Both samples of EABr:urea (0.2:0.8) and BABr : urea (0.2:0.8) show two endothermic peaks, due to the phase separation at higher urea concentration.

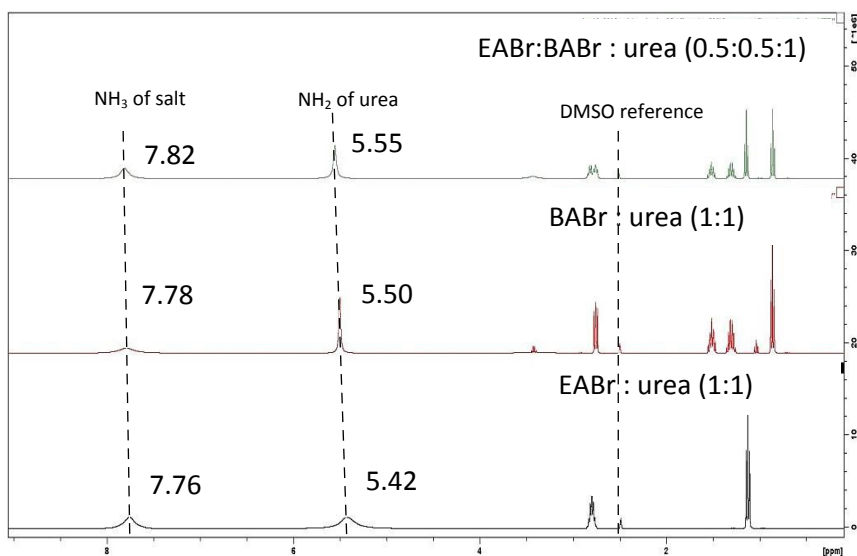

**Figure S2.** <sup>1</sup>H NMR spectra of EABr:urea (1:1), BABr:urea (1:1) and EABr:BABr:urea (0.5:0.5:1) showing the shift of NH<sub>3</sub> and NH<sub>2</sub> peaks toward higher chemical shifts.

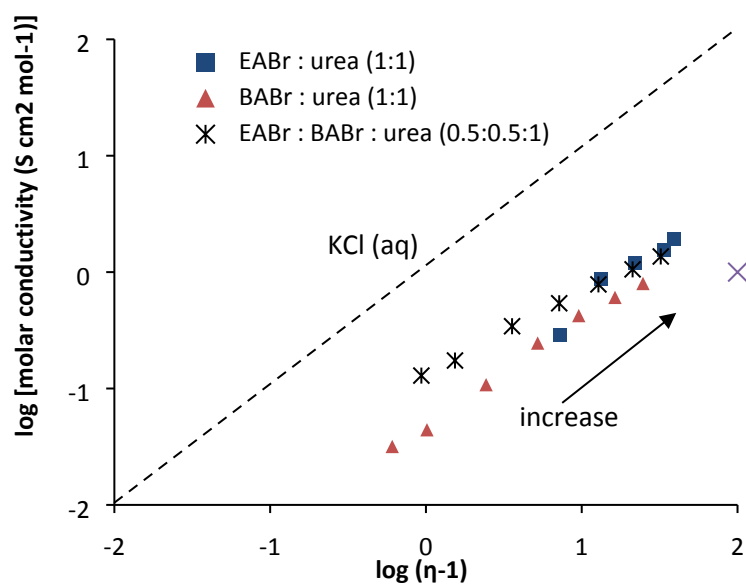

**Figure S3.** Walden plot of EABr : urea, BABr : urea and EABr-BABr : urea mixtures as a function of temperature.

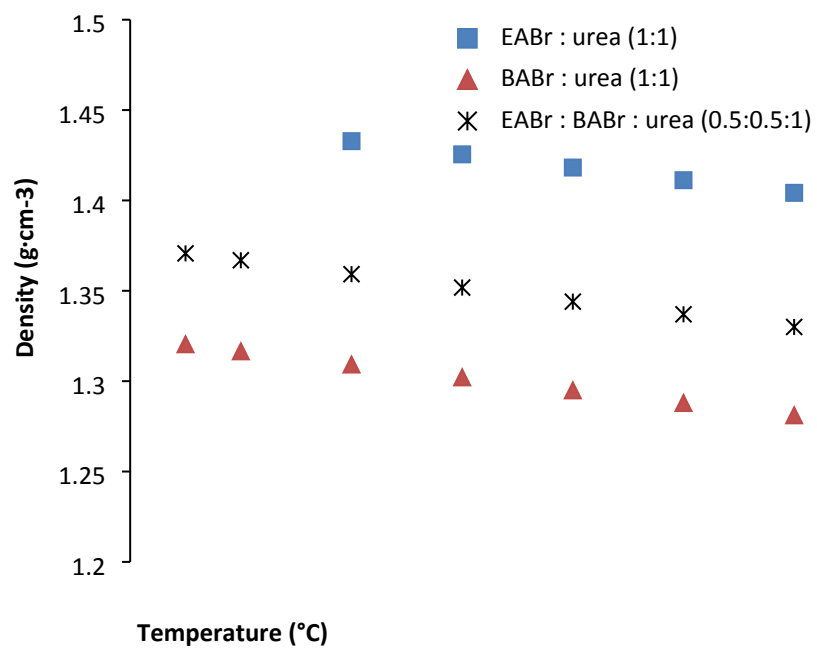

**Figure S4.** Densities of EABr : urea, BABr : urea and EABr : BABr : urea mixtures as function of temperature.
